# Supplementary material for: Thermal considerations for microswimmer trap-and-release using standing surface acoustic waves
Source: Royal Society of Chemistry journal article supplement (doi:10.1039/d1lc00257k), 2021-01-01
Supplement: d1lc00257k1.pdf [file d1lc00257k1.pdf]

**Electronic Supplementary Information: Thermal considerations for microswimmer  
trap-and-release using standing surface acoustic waves**

Mingyang Cui,<sup>a</sup> Minji Kim,<sup>a</sup> Patricia B. Weisensee,<sup>a</sup> and J. Mark Meacham<sup>\*a</sup>

<sup>a</sup> Department of Mechanical Engineering and Materials Science, Washington University  
in St. Louis, St. Louis, Missouri 63130, USA

\*Corresponding author: J. Mark Meacham  
Department of Mechanical Engineering and Materials Science,  
Washington University in St. Louis  
One Brookings Drive, St. Louis, MO 63130  
Email: [meachamjm@wustl.edu](mailto:meachamjm@wustl.edu)  
Phone: +1 (314) 935-3821

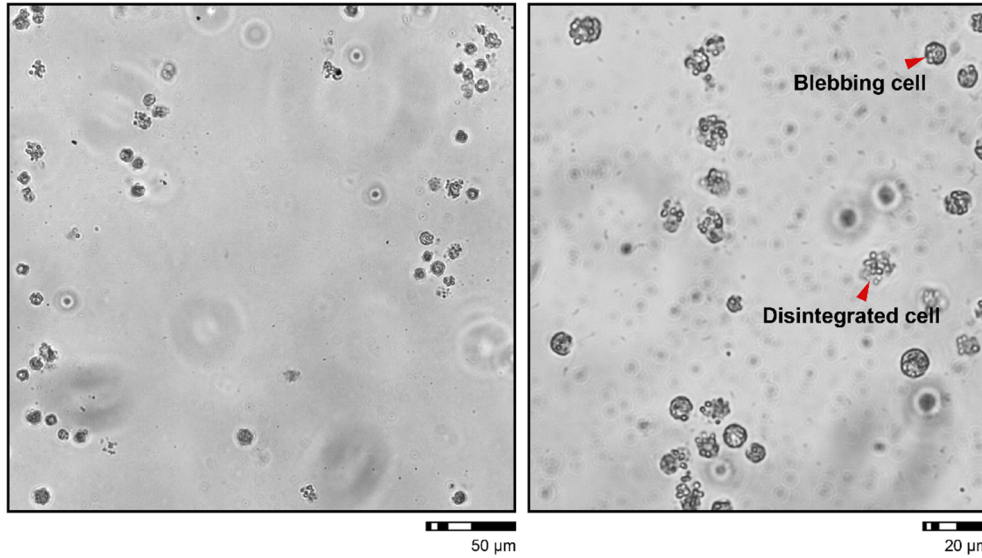

**Figure S1.** Brightfield microscopy images of heat-induced damage to *C. reinhardtii* cells after trap-and-release in the PDMS-based microchannel driven at 24.05 MHz and 25 V<sub>pp</sub>.

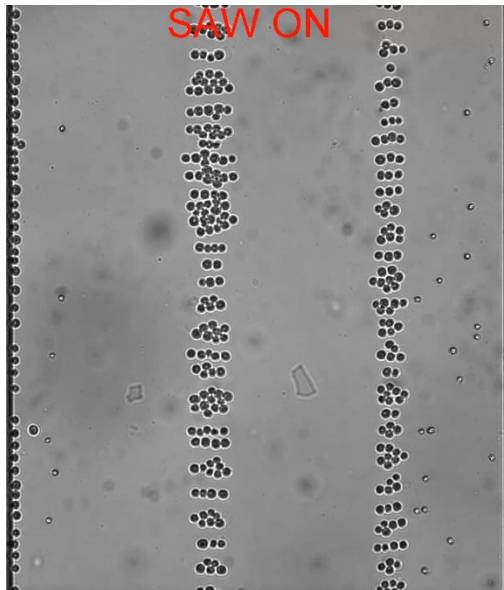

**Movie S1.** Trap-and-release in the PDMS-based microchannel driven at 9.62 MHz and 25 V<sub>pp</sub>. The PDMS-based device is not able to trap swimming *C. reinhardtii* but focuses immotile cells. Immotile *C. reinhardtii* cells do not redistribute after the signal is turned off.

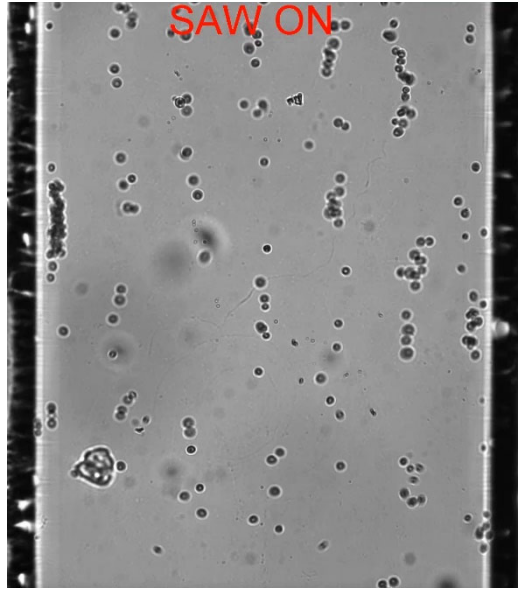

**Movie S2.** Trap-and-release in the glass-based microchannel driven at 9.62 MHz and 25 V<sub>pp</sub>. The glass-based device successfully traps live *C. reinhardtii* at SBAW nodal positions. The motile *C. reinhardtii* cells redistribute evenly throughout the channel after the signal is removed.

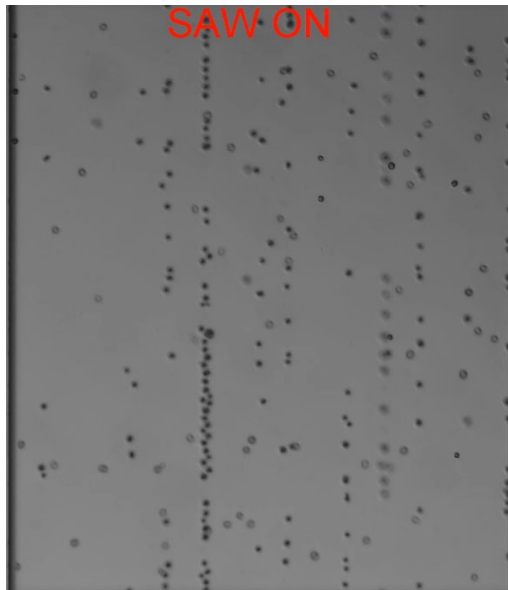

**Movie S3.** Trap-and-release in the PDMS-based microchannel driven at 24.05 MHz and 25 V<sub>pp</sub>. The PDMS-based device is not able to trap swimming *C. reinhardtii* but focuses immotile cells. Immotile *C. reinhardtii* cells do not redistribute after the signal is turned off.

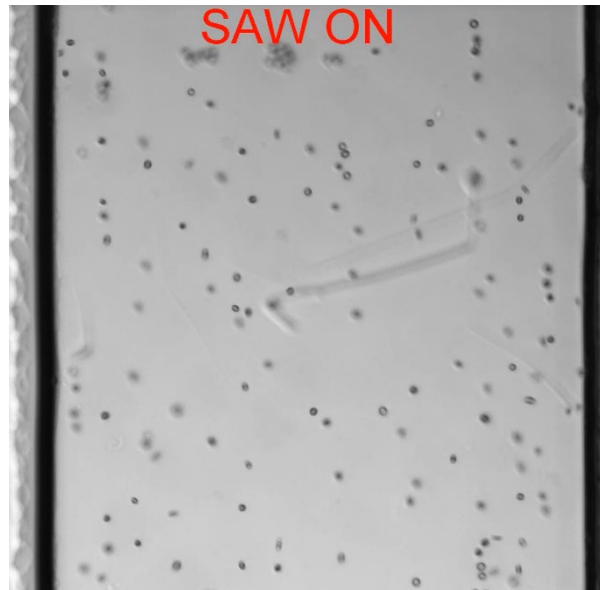

**Movie S4.** Trap-and-release in the glass-based microchannel driven at 24.05 MHz and 25 V<sub>pp</sub>. The glass-based device successfully traps live *C. reinhardtii* at SBAW nodal positions. The motile *C. reinhardtii* cells redistribute evenly throughout the channel after the signal is removed.
